# Supplementary material for: Effect of Gut Microbiota on the Pharmacokinetics of Nifedipine in Spontaneously Hypertensive Rats
Source: MDPI journal article supplement (doi:10.3390/pharmaceutics15082085), 2023-08-03
Supplement: s1 [file s1]

## Supplementary Material

### Supplementary Figures and Tables

### Supplementary Figure

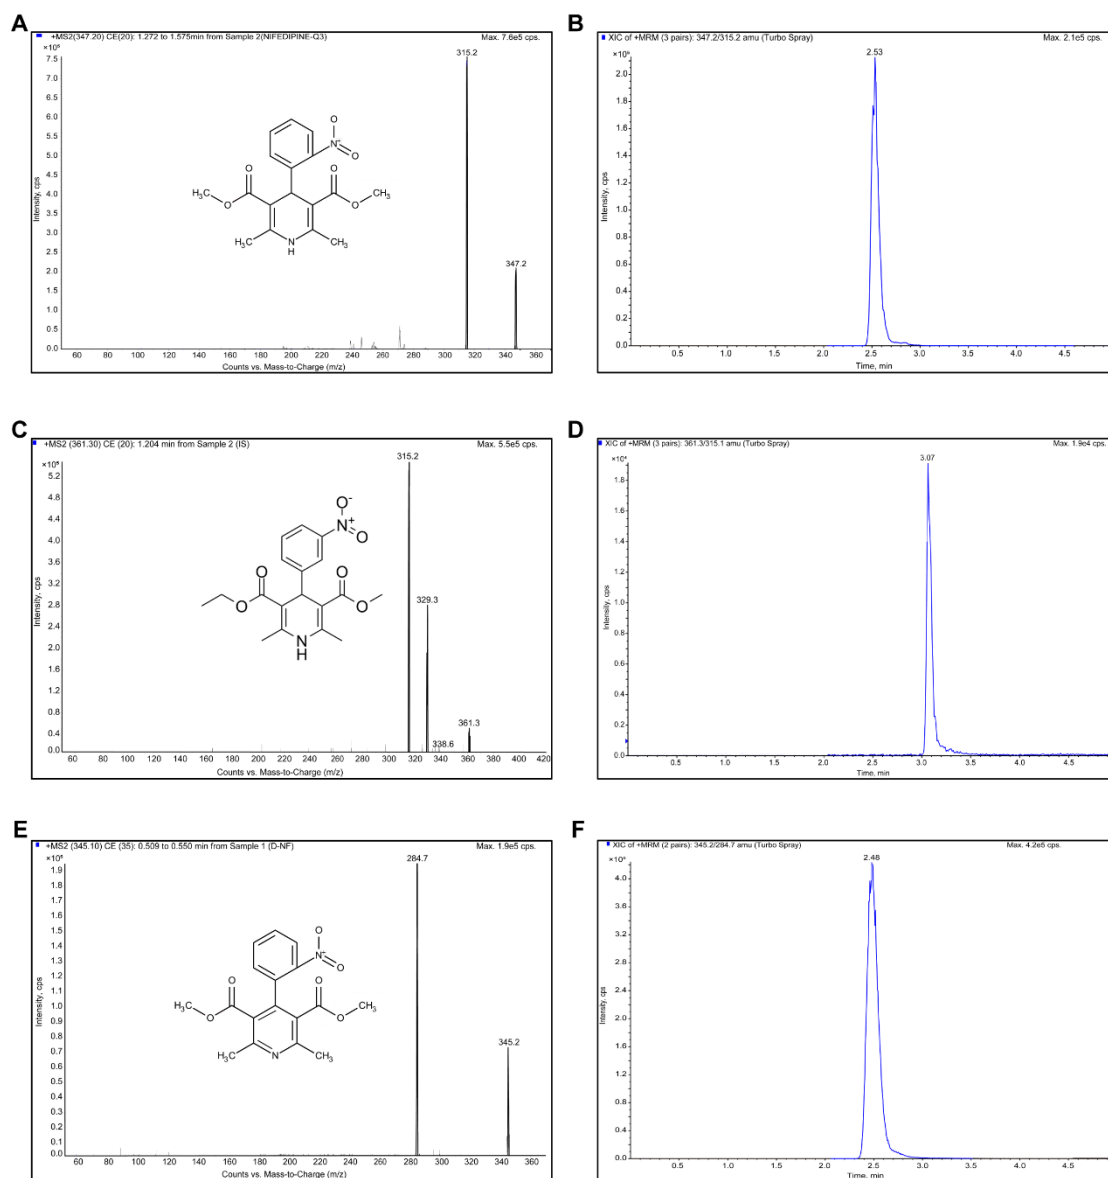

**Supplementary Figure S1.** Product ion spectrum of (A) nifedipine, (C) nitrendipine and (E) dehydronifedipine; HPLC chromatographs of (B) nifedipine, (D) nitrendipine and (F) dehydronifedipine.

## Supplementary Table

**Supplementary Table S1. Primer sequences used for RT-PCR.**

| Gene    | Forward primer (5'→3')    | Reverse primer (5'→3')    |
|---------|---------------------------|---------------------------|
| rGAPDH  | TGAACGGGAAGCTCACTGG       | GCTTCACCACCTTCTTGATGTC    |
| rCYP3A1 | GATGTTGAAATCAATGGTGTG     | TTCAGAGGTATCTGTGTTTCC     |
| rPXR    | CTTGGAGGGAGGTTGGTAGTT     | CTGCCACATGGAGTCAAATCA     |
| rMdr1a  | AGGCAATGGCAACATTTTTTGGTGG | GATAAGCAGAAAAGCTGCACCCATG |
